# Supplementary material for: Dynamics of Antibody Responses after Asymptomatic and Mild to Moderate SARS-CoV-2 Infections: Real-World Data in a Resource-Limited Country
Source: MDPI journal article supplement (doi:10.3390/tropicalmed8040185), 2023-03-23
Supplement: s1 [file s1]

**Supplementary Table S1.** Booster vaccine versus reinfection status

| Booster vaccine                 | Reinfection (n=20) | OR (95% CI)         |
|---------------------------------|--------------------|---------------------|
| No booster dose (n = 251)       | 14                 | Reference           |
| Boost within 3 months (n = 324) | 6                  | 0.319 (0.121–0.843) |

CI, confidence interval; OR, odds ratio

**Supplementary Table S2.** Anti-RBD IgG and NAb against Wuhan and Delta strains levels in participants with 3 doses of COVID-19 vaccine at 3-month follow-up; n=52. All antibody levels are presented as median (interquartile range).

| Regimen               | Primary series         | Booster dose | Anti-RBD IgG (AU/ml)      | NAb - Wuhan (% inhibition) | NAb - Delta (% inhibition) |
|-----------------------|------------------------|--------------|---------------------------|----------------------------|----------------------------|
| 1 (n = 28)            | 2 Inactivated vaccines | AZ           | 10113<br>(6697, 17 401)   | 97.5<br>(97.1, 98.1)       | 96.5<br>(90.8, 97.8)       |
| 2 (n = 20)            | 2 Inactivated vaccines | mRNA         | 23099<br>(11 160, 36 247) | 97.6<br>(97.0, 98.1)       | 98.1<br>(93.9, 98.7)       |
| 3 (n = 4)             | At least 1 AZ          | mRNA         | 20969<br>(13 308, 46 608) | 97.5<br>(97.2, 97.7)       | 98.0<br>(94.6, 98.8)       |
| <b>P value</b>        |                        |              | 0.002                     | 0.941                      | 0.125                      |
| <i>P</i> value 1 vs 2 |                        |              | 0.002                     |                            |                            |
| <i>P</i> value 1 vs 3 |                        |              | 0.125                     |                            |                            |
| <i>P</i> value 2 vs 3 |                        |              | 1.000                     |                            |                            |

AU, arbitrary unit; AZ, AstraZeneca; mRNA, messenger RNA; NAb, neutralizing antibody; RBD, receptor binding domain

**Supplementary Table S3.** Anti-RBD IgG and NAb against Wuhan and Delta strains levels for various regimens of COVID-19 vaccine in all participants; n = 600. All antibody levels are presented as median (interquartile range).

| Group * |             | Anti-RBD IgG (AU/ml) |                |                  | NAb – Wuhan (% inhibition) |              |              | NAb – Delta (% inhibition) |              |              |
|---------|-------------|----------------------|----------------|------------------|----------------------------|--------------|--------------|----------------------------|--------------|--------------|
|         |             | 1 mth                | 3 mth          | 6 mth            | 1 mth                      | 3 mth        | 6 mth        | 1 mth                      | 3 mth        | 6 mth        |
| 000     | n (samples) | 3                    | 63             | 30               | 3                          | 63           | 30           | 3                          | 63           | 30           |
|         | Level       | 445                  | 1047           | 556              | 39.8                       | 79.9         | 40.1         | 4.5                        | 14.3         | 1.8          |
|         |             | (213, 445)           | (547, 2932)    | (279, 2472)      | (26.5, 39.8)               | (46.4, 95.3) | (24.2, 90.5) | (3.2, 4.5)                 | (3.5, 65.2)  | (0, 47.9)    |
| 100     | n (samples) | 11                   | 50             | 18               | 11                         | 50           | 18           | 11                         | 50           | 18           |
|         | Level       | 28542                | 9315           | 3569             | 97.9                       | 96.9         | 95.6         | 98.5                       | 91.1         | 73.3         |
|         |             | (17 158, 37 863)     | (2841, 17 441) | (1306, 6497)     | (97.7, 98.1)               | (95.9, 97.5) | (84.3, 96.8) | (98.2, 98.7)               | (56.9, 97.6) | (17.0, 92.9) |
| 010     | n (samples) | 2                    | 73             | 51               | 2                          | 73           | 51           | 2                          | 73           | 51           |
|         | Level       | 221                  | 11275          | 3877             | 44.6                       | 97.4         | 96.0         | 2.1                        | 97.2         | 88.0         |
|         |             | (90, 221)            | (3757, 20 043) | (1798, 7553)     | (24.2, 44.6)               | (95.9, 98.0) | (87.8, 96.7) | (0, 2.1)                   | (85.2, 98.5) | (34.1, 96.3) |
| 110     | n (samples) | 4                    | 104            | 72               | 4                          | 104          | 72           | 4                          | 104          | 72           |
|         | Level       | 30917                | 12354          | 4873             | 98.2                       | 97.4         | 95.9         | 98.3                       | 95.8         | 76.0         |
|         |             | (9900, 50 987)       | (6100, 21 013) | (2632, 9740)     | (97.7, 98.3)               | (96.2, 97.9) | (92.5, 96.9) | (98.0, 98.8)               | (84.4, 98.0) | (45.2, 96.5) |
| 001     | n (samples) | 3                    | 33             | 34               | 3                          | 33           | 34           | 3                          | 33           | 34           |
|         | Level       | 1462                 | 771            | 16683            | 71.9                       | 75.2         | 96.4         | 25.0                       | 17.2         | 98.3         |
|         |             | (833, 1462)          | (337, 3871)    | (6216, 33 041)   | (65.3, 71.9)               | (42.9, 95.4) | (95.8, 97.0) | (9.5, 25.0)                | (2.7, 66.8)  | (91.3, 98.7) |
| 101     | n (samples) | 23                   | 129            | 122              | 23                         | 129          | 122          | 23                         | 129          | 122          |
|         | Level       | 37936                | 8097           | 16046            | 97.8                       | 96.9         | 97.0         | 98.6                       | 93.0         | 98.2         |
|         |             | (16 572, 52 608)     | (5121, 15 821) | (9169, 25 643)   | (97.5, 98.3)               | (95.7, 97.6) | (96.3, 97.3) | (98.1, 98.8)               | (76.5, 97.7) | (95.8, 98.7) |
| 011     | n (samples) | 2                    | 50             | 48               | 2                          | 50           | 48           | 2                          | 50           | 48           |
|         | Level       | 20633                | 7293           | 11053            | 97.8                       | 96.9         | 96.3         | 94.5                       | 93.0         | 97.1         |
|         |             | (18 140, 20 633)     | (2809, 23 589) | (4115, 23 923)   | (97.4, 97.8)               | (94.5, 97.7) | (95.4, 96.9) | (91.7, 94.5)               | (46.7, 98.0) | (83.0, 98.4) |
| 111     | n (samples) | 8                    | 97             | 96               | 8                          | 97           | 96           | 8                          | 97           | 96           |
|         | Level       | 28002                | 7547           | 22915            | 98.1                       | 97.0         | 96.9         | 97.3                       | 92.1         | 98.5         |
|         |             | (14 404, 61 772)     | (4535, 16 222) | (13 017, 33 371) | (97.5, 98.3)               | (95.9, 97.6) | (96.3, 97.3) | (96.0, 98.5)               | (75.3, 97.2) | (97.9, 98.8) |
| P value |             | 0.003                | < 0.001        | < 0.001          | 0.005                      | < 0.001      | < 0.001      | < 0.001                    | < 0.001      | < 0.001      |
| Total   | n (samples) | 56                   | 599            | 471              | 56                         | 599          | 471          | 56                         | 599          | 471          |
|         | Level       | 23649                | 7711           | 11 385           | 97.8                       | 96.9         | 96.4         | 98.3                       | 91.9         | 97.0         |
|         |             | (12 104, 49 410)     | (3163, 15 589) | (3868, 22 637)   | (97.4, 98.2)               | (95.3, 97.6) | (95.5, 97.1) | (96.0, 98.7)               | (58.7, 97.7) | (77.5, 98.6) |

AU, arbitrary unit; IgG, immunoglobulin G; NAb, neutralizing antibody; RBD, receptor binding domain

\*Group: 000, did not receive vaccine at any time; 100, received vaccine before the illness but did not receive after the illness; 010, received vaccine only within 3 months postinfection; 110, received vaccine before the illness and boost after the illness within 3 months; 001, received vaccine between 3–6 months postinfection only; 101, received vaccine before the illness and boost after the illness only at 3–6 months postinfection; 011,

did not receive vaccine before the illness and received booster vaccine 2 doses at 0–3 months and 3–6 months postinfection; 111, received vaccine all the period (before the illness, 0–3 months postinfection, 3–6 postinfection)

**Supplementary Table S4.** Anti-RBD IgG and NAb against Wuhan and Delta strains levels for various regimens of COVID-19 vaccine in immunocompetent participants; n = 566. All antibody levels are presented as median (interquartile range).

| Group * |             | Anti-RBD IgG (AU/ml)      |                         |                           | NAb – Wuhan (% inhibition) |                      |                      | NAb – Delta (% inhibition) |                      |                      |
|---------|-------------|---------------------------|-------------------------|---------------------------|----------------------------|----------------------|----------------------|----------------------------|----------------------|----------------------|
|         |             | 1 mth                     | 3 mth                   | 6 mth                     | 1 mth                      | 3 mth                | 6 mth                | 1 mth                      | 3 mth                | 6 mth                |
| 000     | n (samples) | 3                         | 60                      | 27                        | 3                          | 60                   | 27                   | 3                          | 60                   | 27                   |
|         | Level       | 445<br>(213, 445)         | 1049<br>(567, 4407)     | 522<br>(284, 2107)        | 39.8<br>(26.5, 39.8)       | 80.3<br>(51.9, 96.1) | 39.4<br>(25.0, 82.0) | 4.5<br>(3.2, 4.5)          | 14.6<br>(3.8, 65.9)  | 1.7<br>(0, 38.3)     |
| 100     | n (samples) | 11                        | 49                      | 18                        | 11                         | 49                   | 18                   | 11                         | 49                   | 18                   |
|         | Level       | 28542<br>(17 158, 37 863) | 9496<br>(2802, 17 683)  | 3569<br>(1306, 6497)      | 97.9<br>(97.7, 98.1)       | 96.9<br>(95.8, 97.5) | 95.6<br>(84.3, 96.8) | 98.5<br>(98.2, 98.7)       | 91.1<br>(55.2, 97.6) | 73.3<br>(17.0, 92.9) |
| 010     | n (samples) | 2                         | 67                      | 45                        | 2                          | 67                   | 45                   | 2                          | 67                   | 45                   |
|         | Level       | 221<br>(90, 221)          | 10227<br>(3664, 19 705) | 3751<br>(1730, 7091)      | 44.6<br>(24.2, 44.6)       | 97.4<br>(95.9, 97.9) | 95.8<br>(87.8, 96.4) | 2.1<br>(0, 2.1)            | 97.0<br>(83.0, 98.5) | 86.9<br>(33.7, 96.2) |
| 110     | n (samples) | 3                         | 99                      | 68                        | 3                          | 99                   | 68                   | 3                          | 99                   | 68                   |
|         | Level       | 46683<br>(15 151, 46 683) | 12458<br>(6043, 21 031) | 4873<br>(2632, 9740)      | 98.3<br>(98.0, 98.3)       | 97.5<br>(96.6, 98.0) | 96.0<br>(93.0, 96.9) | 98.7<br>(98.0, 98.7)       | 95.7<br>(84.9, 98.0) | 76.0<br>(45.2, 96.1) |
| 001     | n (samples) | 3                         | 31                      | 32                        | 3                          | 31                   | 32                   | 3                          | 31                   | 32                   |
|         | Level       | 1462<br>(833, 1462)       | 828<br>(337, 3872)      | 17675<br>(7304, 34 096)   | 71.9<br>(65.3, 71.9)       | 76.0<br>(43.0, 96.9) | 96.4<br>(95.8, 97.2) | 25.0<br>(9.5, 25.0)        | 20.1<br>(3.3, 71.6)  | 98.4<br>(93.0, 98.8) |
| 101     | n (samples) | 19                        | 118                     | 113                       | 19                         | 118                  | 113                  | 19                         | 118                  | 113                  |
|         | Level       | 46160<br>(18 532, 54 968) | 8315<br>(5194, 17 474)  | 16100<br>(9398, 25 644)   | 97.9<br>(97.7, 98.3)       | 96.8<br>(95.8, 97.6) | 97.0<br>(96.3, 97.3) | 98.7<br>(98.2, 98.8)       | 94.1<br>(76.6, 97.8) | 98.2<br>(96.2, 98.7) |
| 011     | n (samples) | 2                         | 47                      | 45                        | 2                          | 47                   | 45                   | 2                          | 47                   | 45                   |
|         | Level       | 20633<br>(18 140, 20 633) | 7676<br>(2831, 23 127)  | 10413<br>(4352, 22 894)   | 97.8<br>(97.4, 97.8)       | 96.9<br>(94.9, 97.7) | 96.3<br>(95.6, 96.9) | 94.5<br>(91.7, 94.5)       | 93.2<br>(54.1, 98.0) | 97.0<br>(83.2, 98.3) |
| 111     | n (samples) | 8                         | 94                      | 93                        | 8                          | 94                   | 93                   | 8                          | 94                   | 93                   |
|         | Level       | 28002<br>(14 404, 61 772) | 7504<br>(4536, 15 634)  | 22518<br>(13 228, 33 319) | 98.1<br>(97.5, 98.3)       | 97.0<br>(95.9, 97.6) | 96.9<br>(96.3, 97.3) | 97.3<br>(96.0, 98.5)       | 91.8<br>(74.3, 97.2) | 98.5<br>(97.9, 98.8) |
| P value |             | 0.003                     | < 0.001                 | < 0.001                   | 0.004                      | < 0.001              | < 0.001              | < 0.001                    | < 0.001              | < 0.001              |
| Total   | n (samples) | 51                        | 565                     | 441                       | 51                         | 565                  | 441                  | 51                         | 565                  | 441                  |
|         | Level       | 24171<br>(11 872, 51 165) | 7739<br>(3255, 15 665)  | 11385<br>(3837, 23 064)   | 97.8<br>(97.1, 98.2)       | 96.9<br>(95.4, 97.6) | 96.4<br>(95.5, 97.1) | 98.3<br>(95.4, 98.7)       | 92.2<br>(59.6, 97.7) | 97.0<br>(77.1, 98.6) |

AU, arbitrary unit; IgG, immunoglobulin G; NAb, neutralizing antibody; RBD, receptor binding domain

\*Group: 000, did not receive vaccine at any time; 100, received vaccine before the illness but did not receive after the illness; 010, received vaccine only within 3 months postinfection; 110, received vaccine before the illness and boost after the illness within 3 months; 001, received vaccine between 3–6 months postinfection only; 101, received vaccine before the illness and boost after the illness only at 3–6 months postinfection; 011, did not receive vaccine before the illness and received booster vaccine 2 doses at 0–3 months and 3–6 months postinfection; 111, received vaccine all the period (before the illness, 0–3 months postinfection, 3–6 postinfection)

**Supplementary Table S5.** Anti-RBD IgG and NAb against Wuhan and Delta strains levels for various regimens of COVID-19 vaccine in immunocompromised participants; n = 14. All antibody levels are presented as median (interquartile range).

| Group* |                      | Anti-RBD IgG (AU/ml) |                              |                                | NAb – Wuhan (% inhibition) |                            |                            | NAb – Delta (% inhibition) |                            |                            |
|--------|----------------------|----------------------|------------------------------|--------------------------------|----------------------------|----------------------------|----------------------------|----------------------------|----------------------------|----------------------------|
|        |                      | 1 mth                | 3 mth                        | 6 mth                          | 1 mth                      | 3 mth                      | 6 mth                      | 1 mth                      | 3 mth                      | 6 mth                      |
| 000    | n (samples)<br>Level |                      | 1<br>35<br>(35, 35)          | 1<br>22<br>(22, 22)            |                            | 1<br>28<br>(28, 28)        | 1<br>0<br>(0, 0)           |                            | 1<br>0<br>(0, 0)           | 1<br>0<br>(0, 0)           |
| 100    | n (samples)<br>Level |                      |                              |                                |                            |                            |                            |                            |                            |                            |
| 010    | n (samples)<br>Level |                      | 4<br>12346<br>(5322, 63 103) | 4<br>6706<br>(2531, 10 651)    |                            | 4<br>97.3<br>(91.4, 97.8)  | 4<br>96.9<br>(87.3, 97.1)  |                            | 4<br>96.3<br>(64.6, 98.6)  | 4<br>92.2<br>(44.6, 93.8)  |
| 110    | n (samples)<br>Level |                      | 2<br>5067<br>(3486, 5067)    | 2<br>2773<br>(1125, 2773)      |                            | 2<br>81.7<br>(68.4, 81.7)  | 2<br>80.9<br>(73.9, 80.9)  |                            | 2<br>60.8<br>(48.6, 60.8)  | 2<br>37.1<br>(17.5, 37.1)  |
| 001    | n (samples)<br>Level |                      | 1<br>474<br>(474, 474)       | 1<br>13725<br>(13 725, 13 725) |                            | 1<br>49.5<br>(49.5, 49.5)  | 1<br>96.9<br>(96.9, 96.9)  |                            | 1<br>5.0<br>(5.0, 5.0)     | 1<br>98.2<br>(98.2, 98.2)  |
| 101    | n (samples)<br>Level |                      | 1<br>2436<br>(2436, 2436)    | 1<br>4576<br>(4576, 4576)      |                            | 1<br>90.3<br>(90.3, 90.3)  | 1<br>97.0<br>(97.0, 97.0)  |                            | 1<br>25.5<br>(25.5, 25.5)  | 1<br>86.3<br>(86.3, 86.3)  |
| 011    | n (samples)<br>Level |                      | 2<br>14761<br>(314, 14 761)  | 2<br>13738<br>(2037, 13 738)   |                            | 2<br>74.9<br>(51.4, 74.9)  | 2<br>93.1<br>(90.0, 93.1)  |                            | 2<br>53.1<br>(7.55, 53.1)  | 2<br>74.3<br>(49.9, 74.3)  |
| 111    | n (samples)<br>Level |                      | 3<br>22706<br>(4418, 22 706) | 3<br>24047<br>(7753, 24 047)   |                            | 3<br>97.5<br>(95.2, 97.5)  | 3<br>96.9<br>(96.6, 96.9)  |                            | 3<br>96.1<br>(79.4, 96.1)  | 3<br>98.6<br>(94.1, 98.6)  |
| Total  | n (samples)<br>Level |                      | 14<br>5533<br>(1945, 22 966) | 14<br>6706<br>(1866, 16 305)   |                            | 14<br>95.1<br>(64.1, 97.6) | 14<br>96.7<br>(87.0, 96.9) |                            | 14<br>76.2<br>(21.0, 97.7) | 14<br>92.2<br>(44.7, 98.3) |

AU, arbitrary unit; IgG, immunoglobulin G; NAb, neutralizing antibody; RBD, receptor binding domain

\*Group: 000, did not receive vaccine at any time; 100, received vaccine before the illness but did not receive after the illness; 010, received vaccine only within 3 months postinfection; 110, received vaccine before the illness and boost after the illness within 3 months; 001, received vaccine between 3–6 months postinfection only; 101, received vaccine before the illness and boost after the illness only at 3–6 months postinfection; 011, did not receive vaccine before the illness and received booster vaccine 2 doses at 0–3 months and 3–6 months postinfection; 111, received vaccine all the period (before the illness, 0–3 months postinfection, 3–6 postinfection)

\*\*Difference between groups can't be evaluated due to small sample size

**Supplementary Table S6.** Anti-RBD IgG and NAb against Wuhan and Delta strains levels for various regimens of COVID-19 vaccine in participants who had reinfection; n = 20

| Group* |           | Anti-RBD IgG (AU/ml) |                           |                           | NAb – Wuhan (% inhibition) |                      |                      | NAb – Delta (% inhibition) |                      |                      |
|--------|-----------|----------------------|---------------------------|---------------------------|----------------------------|----------------------|----------------------|----------------------------|----------------------|----------------------|
|        |           | 1 mth                | 3 mth                     | 6 mth                     | 1 mth                      | 3 mth                | 6 mth                | 1 mth                      | 3 mth                | 6 mth                |
| 000    | n         |                      | 2                         | 2                         |                            | 2                    | 2                    |                            | 2                    | 2                    |
|        | (samples) |                      |                           |                           |                            |                      |                      |                            |                      |                      |
|        | Level     |                      | 1172<br>(345, 1172)       | 7211<br>(3029, 7211)      |                            | 66.4<br>(40.9, 66.4) | 95.5<br>(93.4, 95.5) |                            | 12.6<br>(0, 12.6)    | 94.0<br>(90.0, 94.0) |
| 100    | n         |                      | 1                         |                           |                            | 1                    |                      |                            | 1                    |                      |
|        | (samples) |                      |                           |                           |                            |                      |                      |                            |                      |                      |
|        | Level     |                      | 9134<br>(9134, 9134)      |                           |                            | 97.5<br>(97.5, 97.5) |                      |                            | 93.9<br>(93.9, 93.9) |                      |
| 010    | n         |                      | 2                         | 2                         |                            | 2                    | 2                    |                            | 2                    | 2                    |
|        | (samples) |                      |                           |                           |                            |                      |                      |                            |                      |                      |
|        | Level     |                      | 44953<br>(39 157, 44 953) | 14792<br>(11 511, 14 792) |                            | 98.1<br>(98.1, 98.1) | 96.4<br>(96.4, 96.4) |                            | 98.7<br>(98.7, 98.7) | 98.5<br>(98.3, 98.5) |
| 110    | n         | 1                    | 3                         | 2                         | 1                          | 3                    | 2                    | 1                          | 3                    | 2                    |
|        | (samples) |                      |                           |                           |                            |                      |                      |                            |                      |                      |
|        | Level     | 8150<br>(8150, 8150) | 14808<br>(11 652, 14 808) | 11422<br>(6537, 11 422)   | 97.6<br>(97.6, 97.6)       | 97.1<br>(95.8, 97.1) | 96.2<br>(95.5, 96.2) | 98<br>(98, 98)             | 96.9<br>(95.9, 96.9) | 98.1<br>(97.6, 98.1) |
| 001    | n         |                      | 1                         | 1                         |                            | 1                    | 1                    |                            | 1                    | 1                    |
|        | (samples) |                      |                           |                           |                            |                      |                      |                            |                      |                      |
|        | Level     |                      | 122<br>(122, 122)         | 2256<br>(2256, 2256)      |                            | 32.3<br>(32.3, 32.3) | 91.4<br>(91.4, 91.4) |                            | 2.0<br>(2.0, 2.0)    | 23.7<br>(23.7, 23.7) |

|       |           |                  |                |                  |              |              |              |              |              |              |
|-------|-----------|------------------|----------------|------------------|--------------|--------------|--------------|--------------|--------------|--------------|
| 101   | n         | 4                | 10             | 8                | 4            | 10           | 8            | 4            | 10           | 8            |
|       | (samples) |                  |                |                  |              |              |              |              |              |              |
|       | Level     | 26585            | 5922           | 14508            | 97.6         | 97.1         | 96.9         | 98.2         | 85.4         | 98.0         |
|       |           | (14 811, 46 446) | (4233, 8963)   | (6958, 28 557)   | (97.5, 97.7) | (94.7, 97.6) | (95.8, 97.2) | (98.1, 98.5) | (73.2, 87.3) | (92.6, 98.5) |
| 011   | n         |                  | 1              | 1                |              | 1            | 1            |              | 1            | 1            |
|       | (samples) |                  |                |                  |              |              |              |              |              |              |
|       | Level     |                  | 1314           | 11704            |              | 94.6         | 97.7         |              | 13.8         | 98.6         |
|       |           |                  | (1314, 1314)   | (11 704, 11 704) |              | (94.6, 94.6) | (97.7, 97.7) |              | (13.8, 13.8) | (98.6, 98.6) |
| 111   | n         |                  |                |                  |              |              |              |              |              |              |
|       | (samples) |                  |                |                  |              |              |              |              |              |              |
|       | Level     |                  |                |                  |              |              |              |              |              |              |
| Total | n         | 5                | 20             | 16               | 5            | 20           | 16           | 5            | 20           | 16           |
|       | (samples) |                  |                |                  |              |              |              |              |              |              |
|       | Level     | 16572            | 6810           | 11607            | 97.6         | 97.0         | 96.6         | 98.1         | 85.8         | 98.1         |
|       |           | (11 187, 43 163) | (2342, 13 581) | (6619, 17 624)   | (97.5, 97.7) | (93.4, 97.6) | (95.6, 97.2) | (98.0, 98.4) | (36.6, 96.7) | (92.6, 98.5) |

AU, arbitrary unit; IgG, immunoglobulin G; NAb, neutralizing antibody; RBD, receptor binding domain

\*Group: 000, did not receive vaccine at any time; 100, received vaccine before the illness but did not receive after the illness; 010, received vaccine only within 3 months postinfection; 110, received vaccine before the illness and boost after the illness within 3 months; 001, received vaccine between 3–6 months postinfection only; 101, received vaccine before the illness and boost after the illness only at 3–6 months postinfection; 011, did not receive vaccine before the illness and received booster vaccine 2 doses at 0–3 months and 3–6 months postinfection; 111, received vaccine all the period (before the illness, 0–3 months postinfection, 3–6 postinfection)

\*\*Difference between groups can't be evaluated due to small sample size

**Supplementary Table S7.** The vaccine regimen of patients who had the reinfection (n=20)

| <b>Group*</b> | <b>n</b> | <b>Vaccine prior to<br/>first infection onset</b> | <b>Vaccine within 3 months<br/>postinfection</b> | <b>Vaccine between 3 and 6<br/>months postinfection</b> |
|---------------|----------|---------------------------------------------------|--------------------------------------------------|---------------------------------------------------------|
| 000           | 2        | no                                                | no                                               | no                                                      |
| 100           | 1        | AZ + PZ                                           | no                                               | N/A                                                     |
| 010           | 2        | no                                                | PZ                                               | no                                                      |
| 110           | 1        | SP + SP                                           | PZ                                               | no                                                      |
|               | 1        | SV + SV + AZ                                      | PZ                                               | no                                                      |
|               | 1        | AZ                                                | AZ                                               | N/A                                                     |
| 001           | 1        | no                                                | no                                               | AZ                                                      |
| 101           | 1        | SV + SV                                           | no                                               | PZ                                                      |
|               | 1        | SP + SP                                           | no                                               | AZ                                                      |
|               | 5        | SV + SV + AZ                                      | no                                               | PZ                                                      |
|               | 2        | AZ + AZ                                           | no                                               | PZ                                                      |
|               | 1        | AZ + AZ                                           | no                                               | AZ                                                      |
| 011           | 1        | no                                                | SV                                               | AZ                                                      |
| 111           | 0        | N/A                                               | N/A                                              | N/A                                                     |

AZ, AstraZeneca; N/A, not available; PZ, Pfizer; SP, Sinopharm; SV, Sinovac (CoronaVac)

\*Group: 000, did not receive vaccine at any time; 100, received vaccine before the illness but did not receive after the illness; 010, received vaccine only within 3 months postinfection; 110, received vaccine before the illness and boost after the illness within 3 months; 001, received vaccine between 3–6 months postinfection only; 101, received vaccine before the illness and boost after the illness only at 3–6 months postinfection; 011, did not receive vaccine before the illness and received booster vaccine 2 doses at 0–3 months and 3–6 months postinfection; 111, received vaccine all the period (before the illness, 0–3 months postinfection, 3–6 postinfection)
